# Supplementary material for: A nitrogen-doped unzipped carbon nanotube/sulfur composite as an advanced cathode for lithium–sulfur batteries
Source: Royal Society of Chemistry journal article supplement (doi:10.1039/c5nj01803j), 2015-01-01
Supplement: c5nj01803j1.pdf [file c5nj01803j1.pdf]

**Supplementary Material (ESI) for New Journal of Chemistry**

**This journal is © The Royal Society of Chemistry 2015**

---

**Electronic Supplementary Information**

**Nitrogen-doped unzipped carbon nanotubes/sulfur composite as  
advanced cathode for lithium-sulfur batteries**

**Liang Chen<sup>a,b</sup>, Zhongxue Chen<sup>a,b</sup>, Zheng Huang<sup>a,b</sup>, Yingfei Wang<sup>a,b</sup>, Haihui Zhou<sup>\*a,b</sup> and  
Yafei Kuang<sup>\*a,b</sup>**

*<sup>a</sup>State Key Laboratory for Chemo/Biosensing and Chemometrics, Hunan University,  
Changsha, 410082, PR China*

*<sup>b</sup>College of Chemistry and Chemical Engineering, Hunan University, Changsha, 410082,  
PR China*

**\* Corresponding authors.**

**Tel.: +86 731 88821603;**

**Fax: +86 731 88713642.**

**E-mail addresses: yafeik@163.com (Yafei Kuang) ; haihuizh@163.com(Haihui Zhou)**

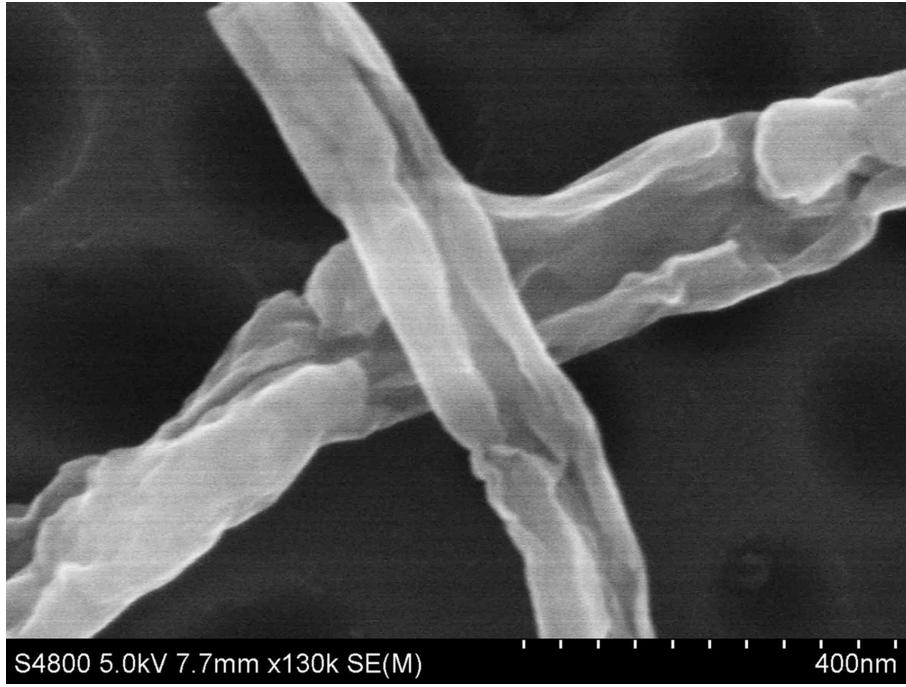

Fig.S1 SEM image of NUCNTs

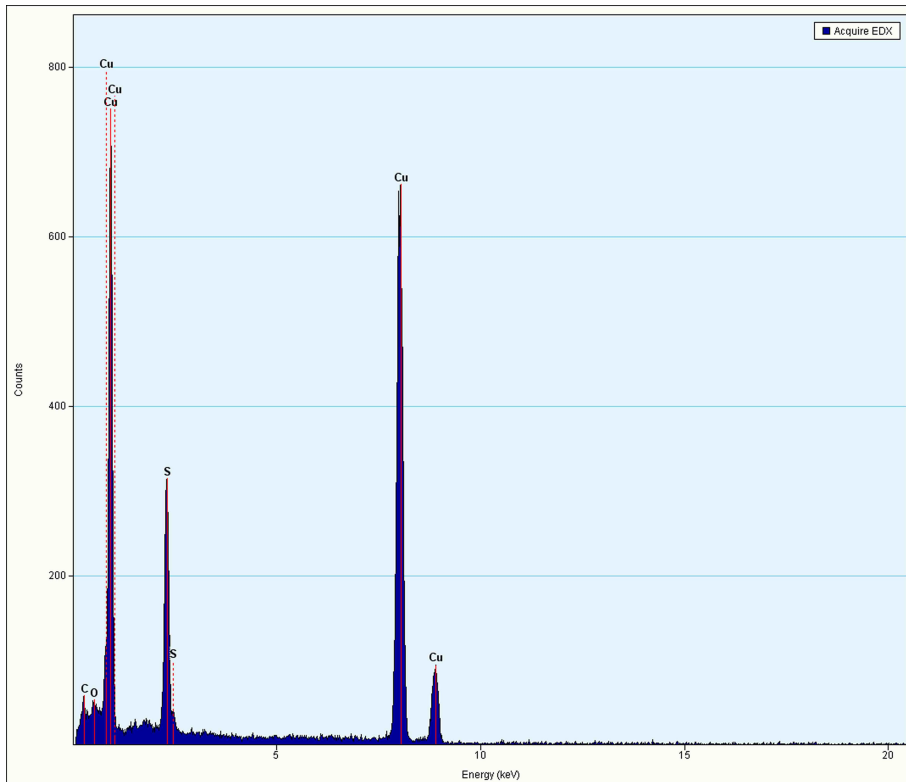

Fig.S2 EDS image of NUCNTs/S composite

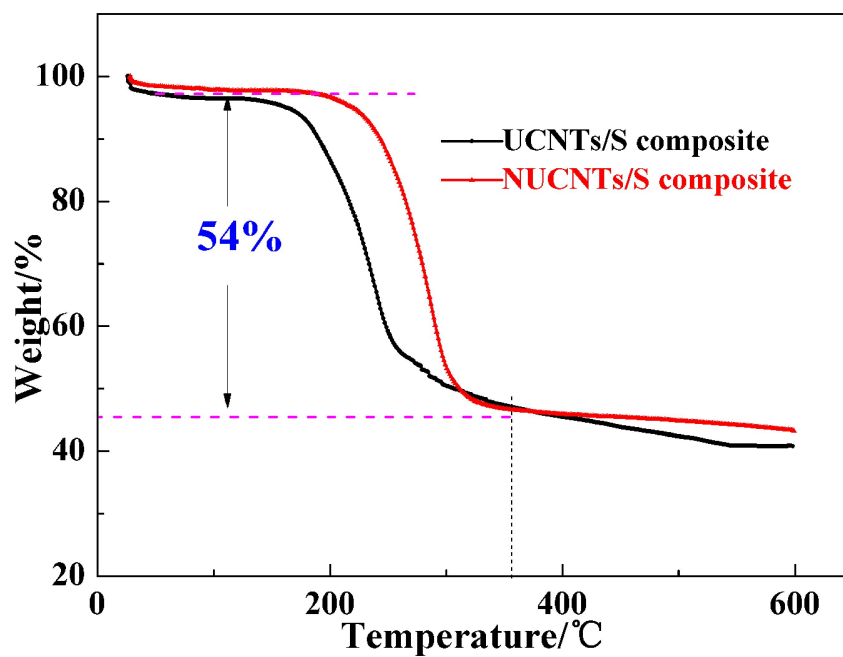

Fig.S3 TGA curves of UCNTs/S and NUCNTs/S composite in N<sub>2</sub> atmosphere

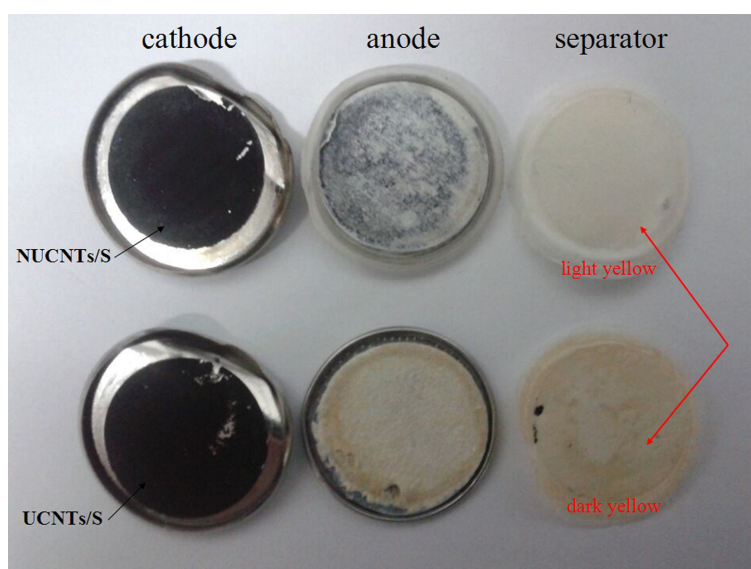

Fig.S4 Photograph of the electrolyte color for NUCNTs/S and UCNTs/S cathodes

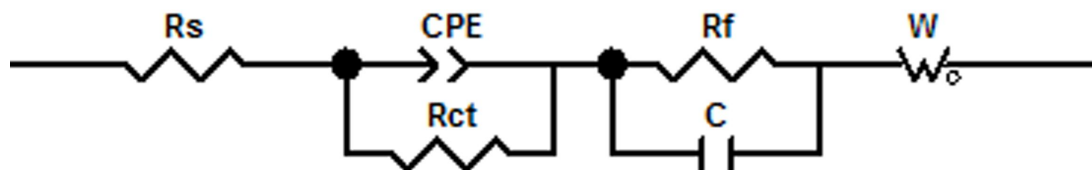

**Fig.S5** Equivalent circuit used for fitting the impedance data

**Table S1** Impedance values of the equivalent circuit fitted for the impedance spectra

| Sample   | $R_s$ | CPE-T  | CPE-P | $R_{ct}$ | $R_f$ | C      | W-R   | W-T   | W-P |
|----------|-------|--------|-------|----------|-------|--------|-------|-------|-----|
| NUCNTs/S | 16.1  | 1.3E-5 | 0.8   | 58.1     | 34.5  | 0.0006 | 409.7 | 572.2 | 0.4 |
| UCNTs/S  | 15.1  | 1.9E-5 | 0.7   | 136.2    | 29.0  | 0.001  | 26.3  | 0.3   | 0.1 |
